# Supplementary material
Source: PubMed Central journal article supplement (PMC3131075)

**Figure 7. Optimal suppression of CHS requires LC-derived IL-10.**

A) Langerin-Cre x IL-10<sup>ff</sup> (black bars) and IL-10<sup>ff</sup> littermate controls (WT, grey bars) were sensitized with 0.5% DNFB or vehicle alone (white bars) and challenged with 0.2% DNFB. Data represents the change of ear thickness over baseline after 24 hr (\*p<0.05). B) Specific ear swelling is shown over 3 days in Langerin-Cre x IL-10<sup>ff</sup> (solid line), WT (broken line) and vehicle controls (thin line). C) As in (A) Langerin-Cre I-A $\beta$ <sup>ff</sup>/IL-10<sup>ff</sup> (black bar), Langerin-Cre I-A $\beta$ <sup>ff</sup> (dark grey bar) and WT (grey bar) (\*p<0.05). D) As in (B) Langerin-Cre I-A $\beta$ <sup>ff</sup>/IL-10<sup>ff</sup> (solid line), Langerin-Cre I-A $\beta$ <sup>ff</sup> (long-dashed line), littermate controls (short-dashed line) and vehicle controls (thin line). E) FasL expression was assessed on LC (left) and Langerin+ DC (right) isolated from the lymph node of Langerin-Cre I-A $\beta$ <sup>ff</sup> (dashed line) and littermate control (solid line) mice (p<0.05 MFI for LC). Shaded area represents isotype control. F) Total LN cells from WT (left) and Langerin-Cre I-A $\beta$ <sup>ff</sup> mice (right) were incubated in complete RPMI overnight with a 10ug/ml blocking anti-CD40 antibody (dashed line) or isotype control (solid line). Levels of FasL expression on cells gated on LC are shown. Representative experiments from at least 3 repeats are shown.

**Supplemental Figure 1. The expression of co-stimulatory molecules is unaffected by the**

**absence of LCs.** A) The expression of indicated surface molecules on DC obtained from skin-draining LN isolated from Langerin-DTA (red) and littermate control (blue) was compared by flow cytometry. Live cells were gated on CD11c+, MHC-II<sup>bright</sup> and as indicated. LC were gated as Langerin+, CD103-, CD11b+. Shaded area represents isotype control. B) The expression of the indicated surface molecules on LC obtained from skin-draining LN isolated from Langerin-Cre I-A $\beta$ <sup>ff</sup>

(solid line) and WT (dashed) mice was compared by flow cytometry. Shaded area represents isotype control.

A

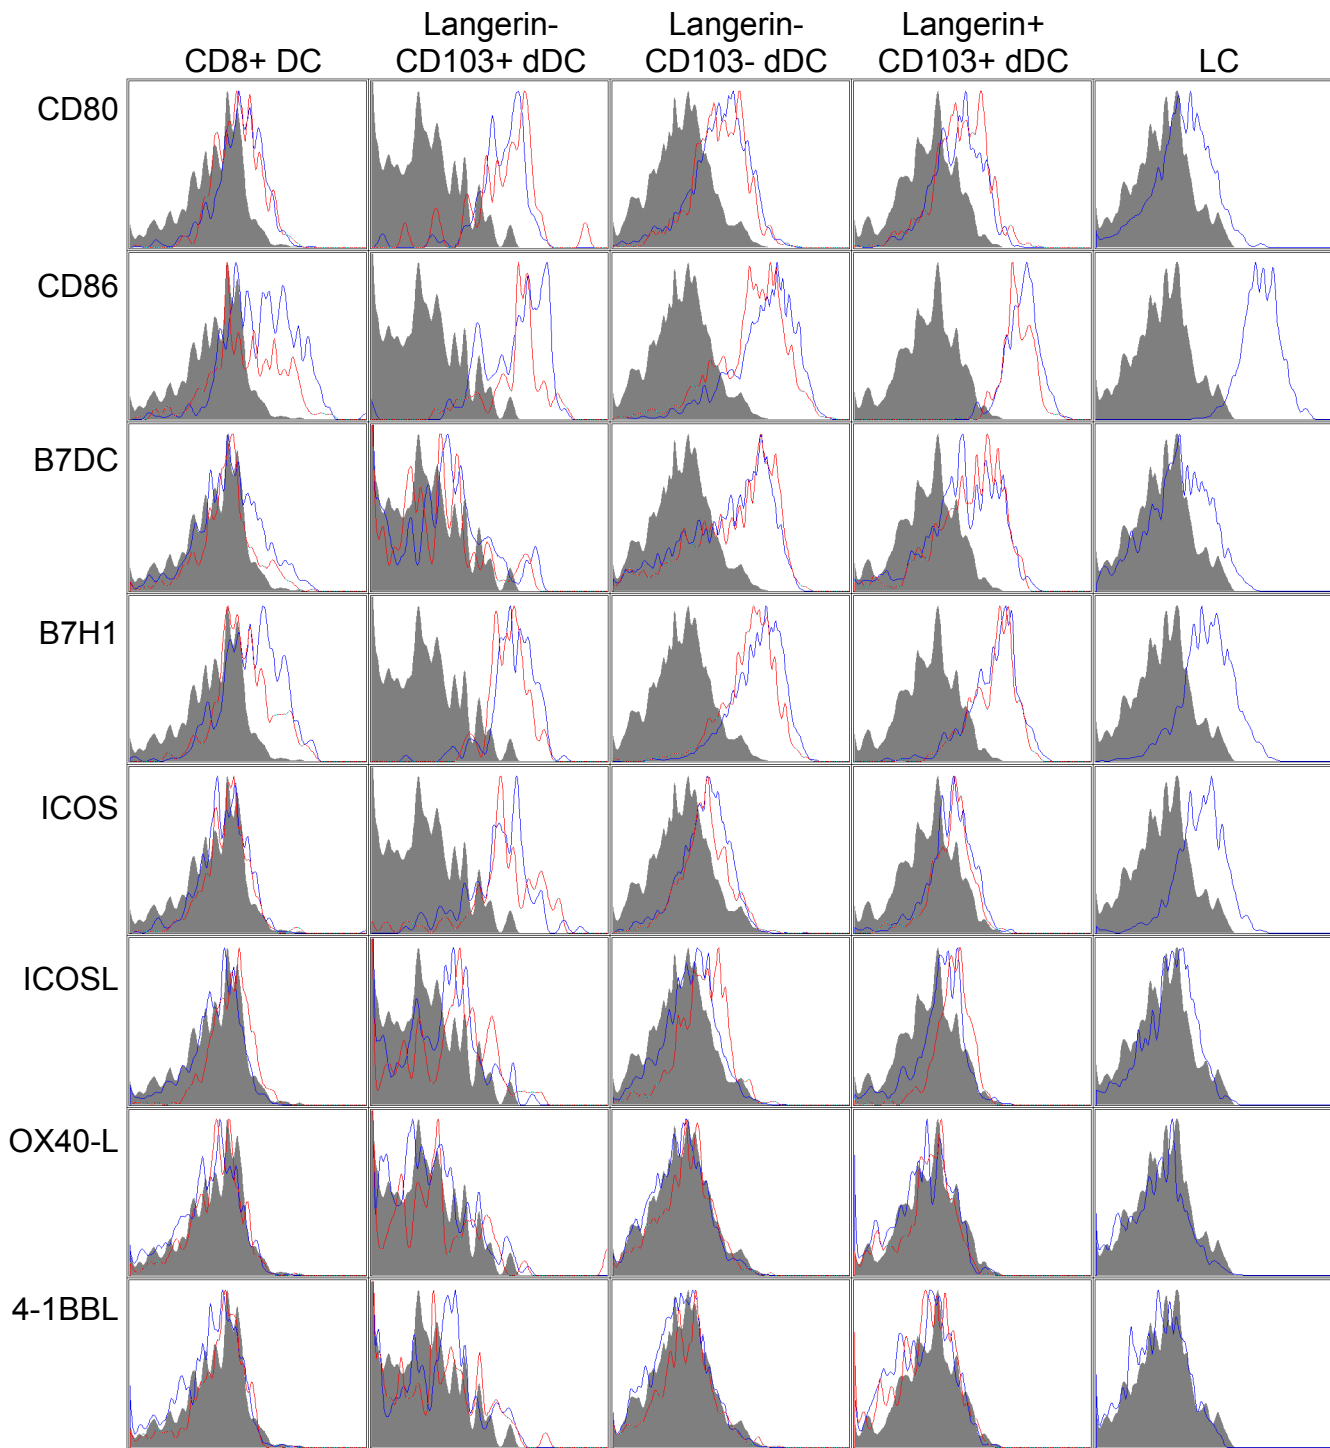

B

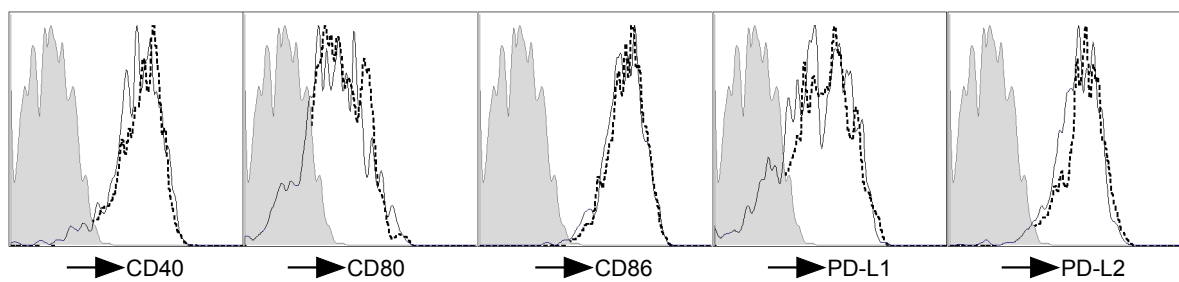

Supplement: NIHMS178803-supplement-01.pdf [file NIHMS178803-supplement-01.pdf]
